# Supplementary material
Source: PubMed Central journal article supplement (PMC3275363)
Supplement: supp_jc.2011-2561_11-2561_Tab_1-2_Figs_1-4.pdf [file supp_jc.2011-2561_11-2561_Tab_1-2_Figs_1-4.pdf]

|                                                           | <b>NFG / NGT</b> | <b>IFG / NGT</b> | <b>NFG / IGT</b> | <b>IFG / IGT</b> | <b>IFG / DM</b> |
|-----------------------------------------------------------|------------------|------------------|------------------|------------------|-----------------|
| <b><i>n</i></b>                                           | 36               | 18               | 36               | 57               | 18              |
| <b>Active GLP-1<sub>10</sub></b><br><b>(pmol/l/10min)</b> | 62.0 ± 13.3      | 37.7 ± 10.2      | 55.5 ± 14.6      | 40.0 ± 7.8       | 24.5 ± 5.8      |
| <b><i>P</i></b>                                           | 0.12             |                  |                  |                  |                 |
| <b>Active GLP-1<sub>20</sub></b><br><b>(pmol/l/20min)</b> | 227.3 ± 43.3     | 148.1 ± 28.8     | 209.1 ± 38.0     | 149.8 ± 23.8     | 108.9 ± 19.0    |
| <b><i>P</i></b>                                           | 0.19             |                  |                  |                  |                 |
| <b>Active GLP-1<sub>30</sub></b><br><b>(pmol/l/30min)</b> | 399.2 ± 66.6     | 283.7 ± 46.0     | 380.2 ± 55.9     | 284.0 ± 37.7     | 238.0 ± 37.9    |
| <b><i>P</i></b>                                           | 0.42             |                  |                  |                  |                 |

Table 1: Area Above Basal for Active GLP-1 (Mean ± SEM) for each group characterized by fasting and glucose tolerance status for the first 10, 20 and 30 minutes of the study. *p*-values obtained by Kruskal-Wallis test (unadjusted for 3 tests).

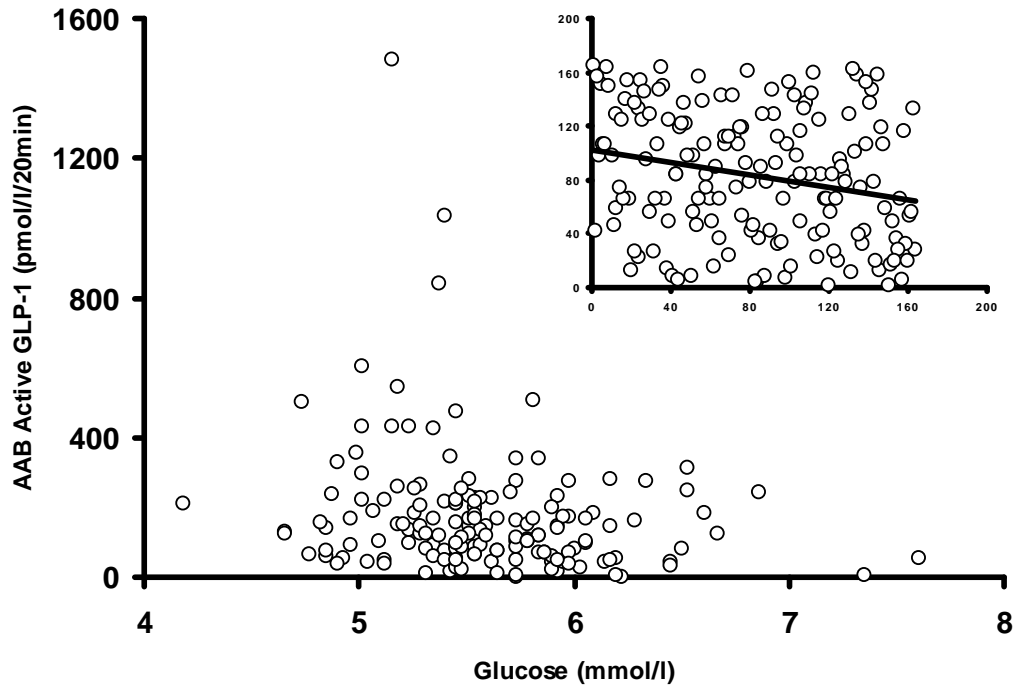

Figure 1: AAB Active GLP-1 concentrations over the first 20 minutes of the study were negatively associated with fasting plasma glucose concentrations, ( $r_s = -0.24$ ,  $p=0.002$ ). The inset panels represent the rank transformed values of integrated GLP-1 concentrations plotted against rank transformed fasting glucose values.

|                       | Active_GLP_AAB_10          | Active_GLP_AAB_20          | Active_GLP_AAB_30          |
|-----------------------|----------------------------|----------------------------|----------------------------|
| Glucose at 0 minutes  | $r_s = -0.18$<br>$p=0.02$  | $r_s = -0.24$<br>$p=0.002$ | $r_s = -0.23$<br>$p=0.004$ |
| Glucose at 10 minutes | $r_s = 0.32$<br>$p<0.0001$ | $r_s = 0.25$<br>$p=0.0011$ | $r_s = 0.20$<br>$p=0.0092$ |
| Glucose at 20 minutes |                            | $r_s = 0.28$<br>$p=0.0004$ | $r_s = 0.25$<br>$p=0.001$  |
| Glucose at 30 minutes |                            |                            | $r_s = 0.088$<br>$p=0.26$  |

Table 2: Spearman correlation coefficients for AAB active GLP-1 and glucose at 0, 10, 20 and 30 minutes. This is suggestive of a weak association of the early rise in active GLP-1 with fasting and early post-challenge glucose concentrations. Since glucose concentrations at 0, 10, 20 and 30 minutes are interdependent, caution should be exercised in interpreting these *post hoc* associations.

The values of glucose at 10 and 20 minutes were **positively** associated with AAB Active GLP-1 (0-20min),  $r_s = 0.21$  ( $p=0.006$ ), and  $r_s = 0.29$  ( $p<0.001$ ), respectively. After adjusting for other covariates in the multiple regression model for AAB Active GLP-1(0-20min), fasting glucose remained significant (negative coefficient [ $p<0.001$ ], partial r-square=.16, while glucose at 10 min remained positively associated [ $p<0.005$ ], partial r-square=.06 and glucose at 20 was not significant.

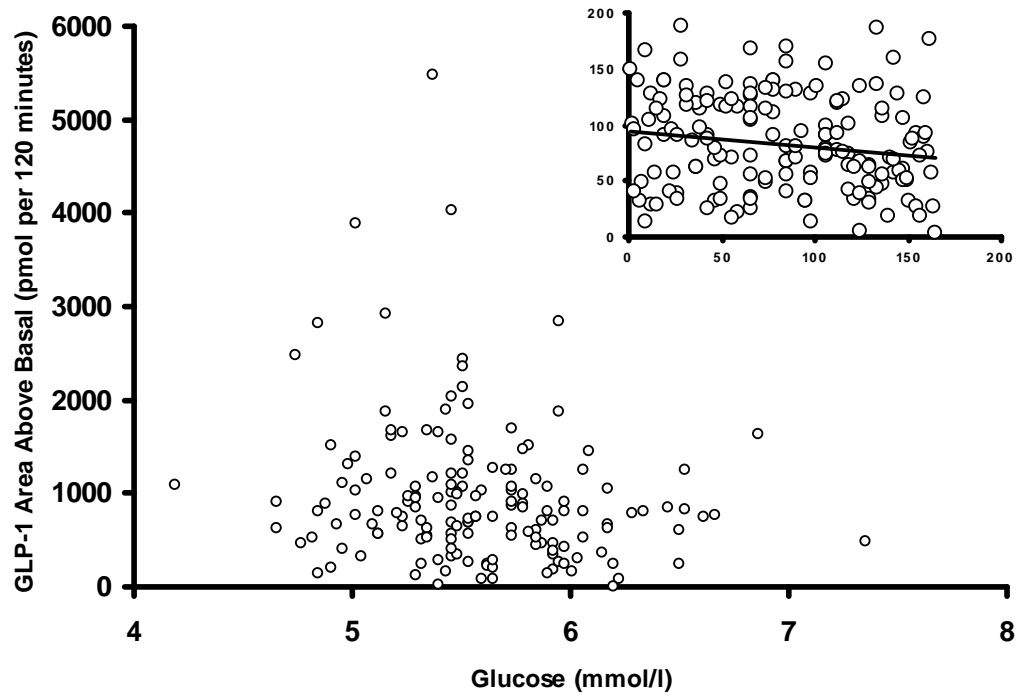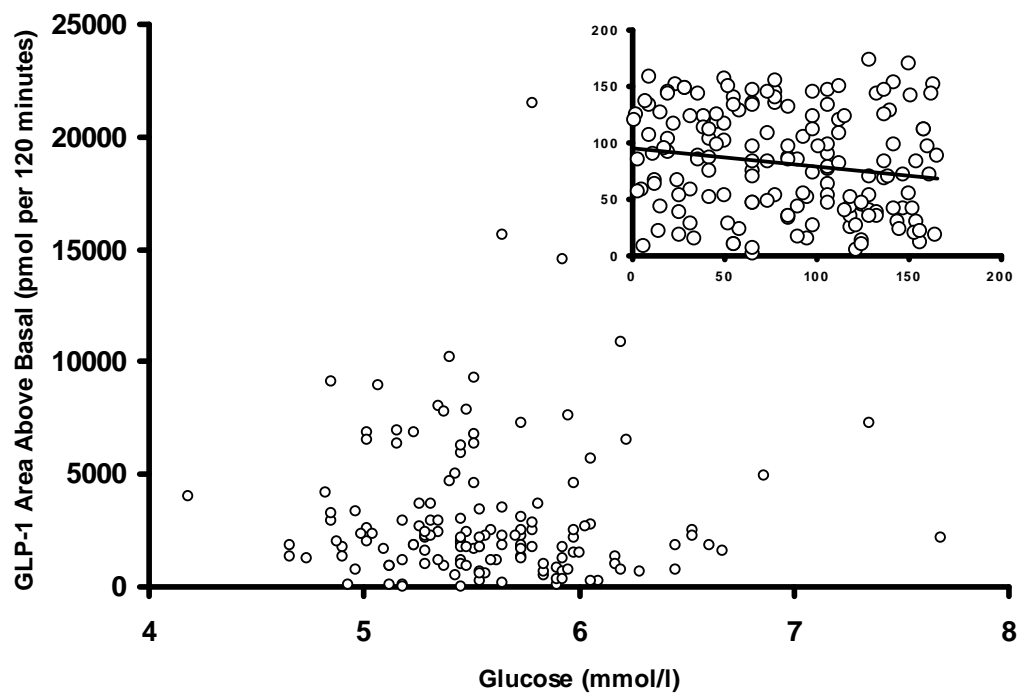

Figure 2: Active (top panel) and total (bottom panel) GLP-1 concentrations were negatively associated with fasting plasma glucose concentrations, ( $r_s = -0.26$ ,  $p < 0.01$ , and  $r_s = -0.20$ ,  $p < 0.05$ , respectively). The inset panels represent the rank transformed values of integrated GLP-1 concentrations plotted against rank transformed fasting glucose values.

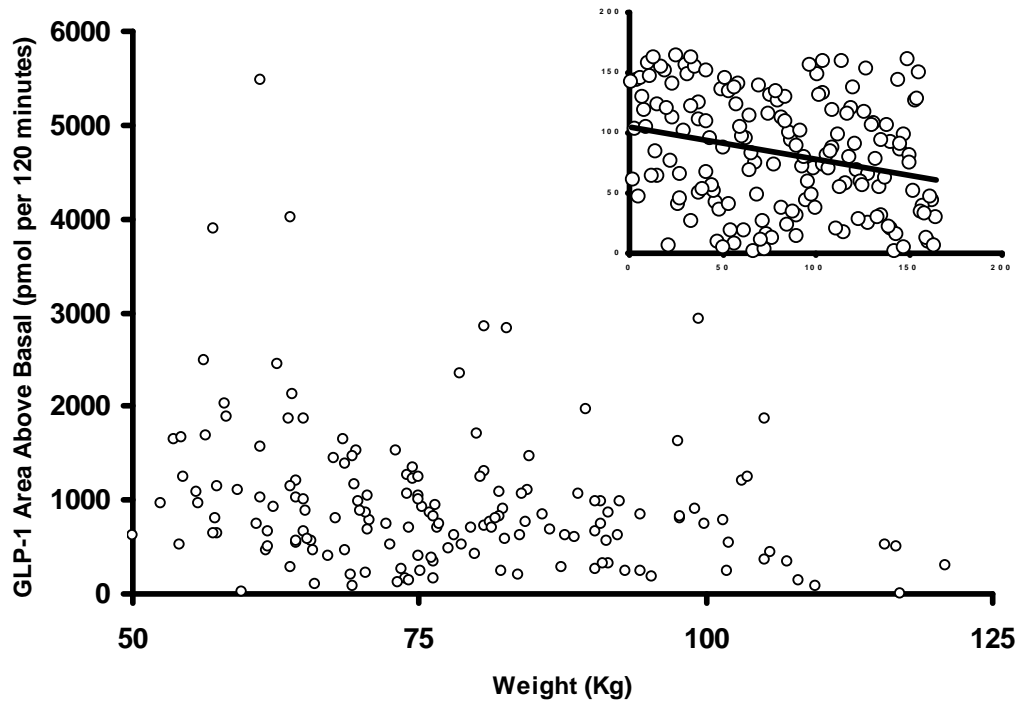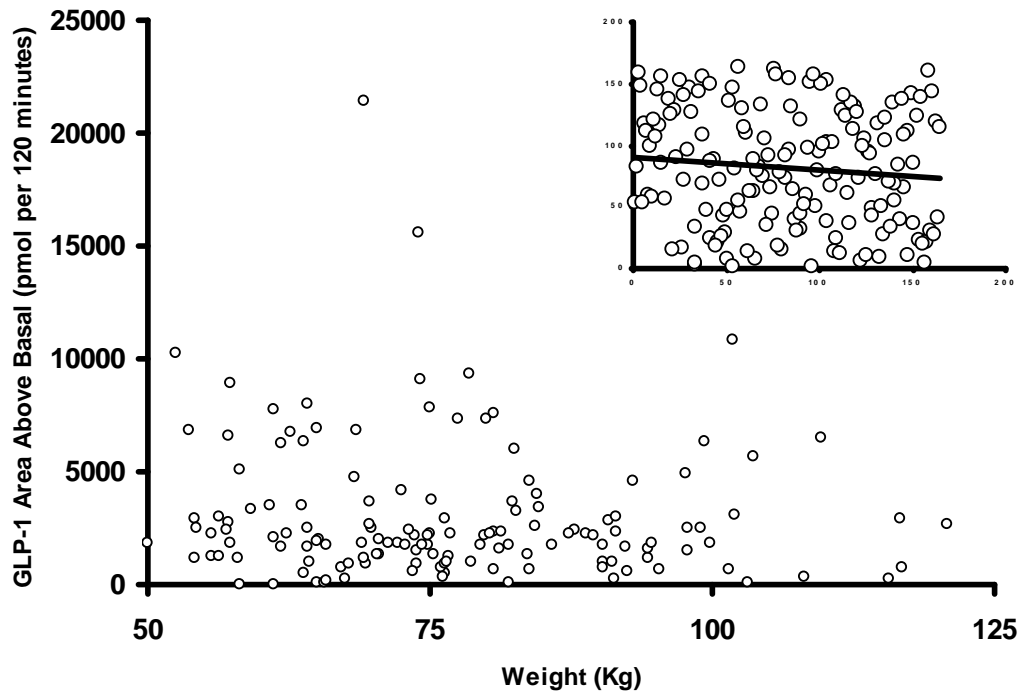

Figure 3: Active (top panel) GLP-1 concentrations were negatively associated with weight ( $r_s = -0.28$ ,  $p < 0.01$ ). In contrast, total (bottom panel) GLP-1 concentrations were not associated with weight, ( $r_s = -0.08$ ,  $p = 0.26$ ). The inset panels represent the rank transformed values of integrated GLP-1 concentrations plotted against rank transformed weight.

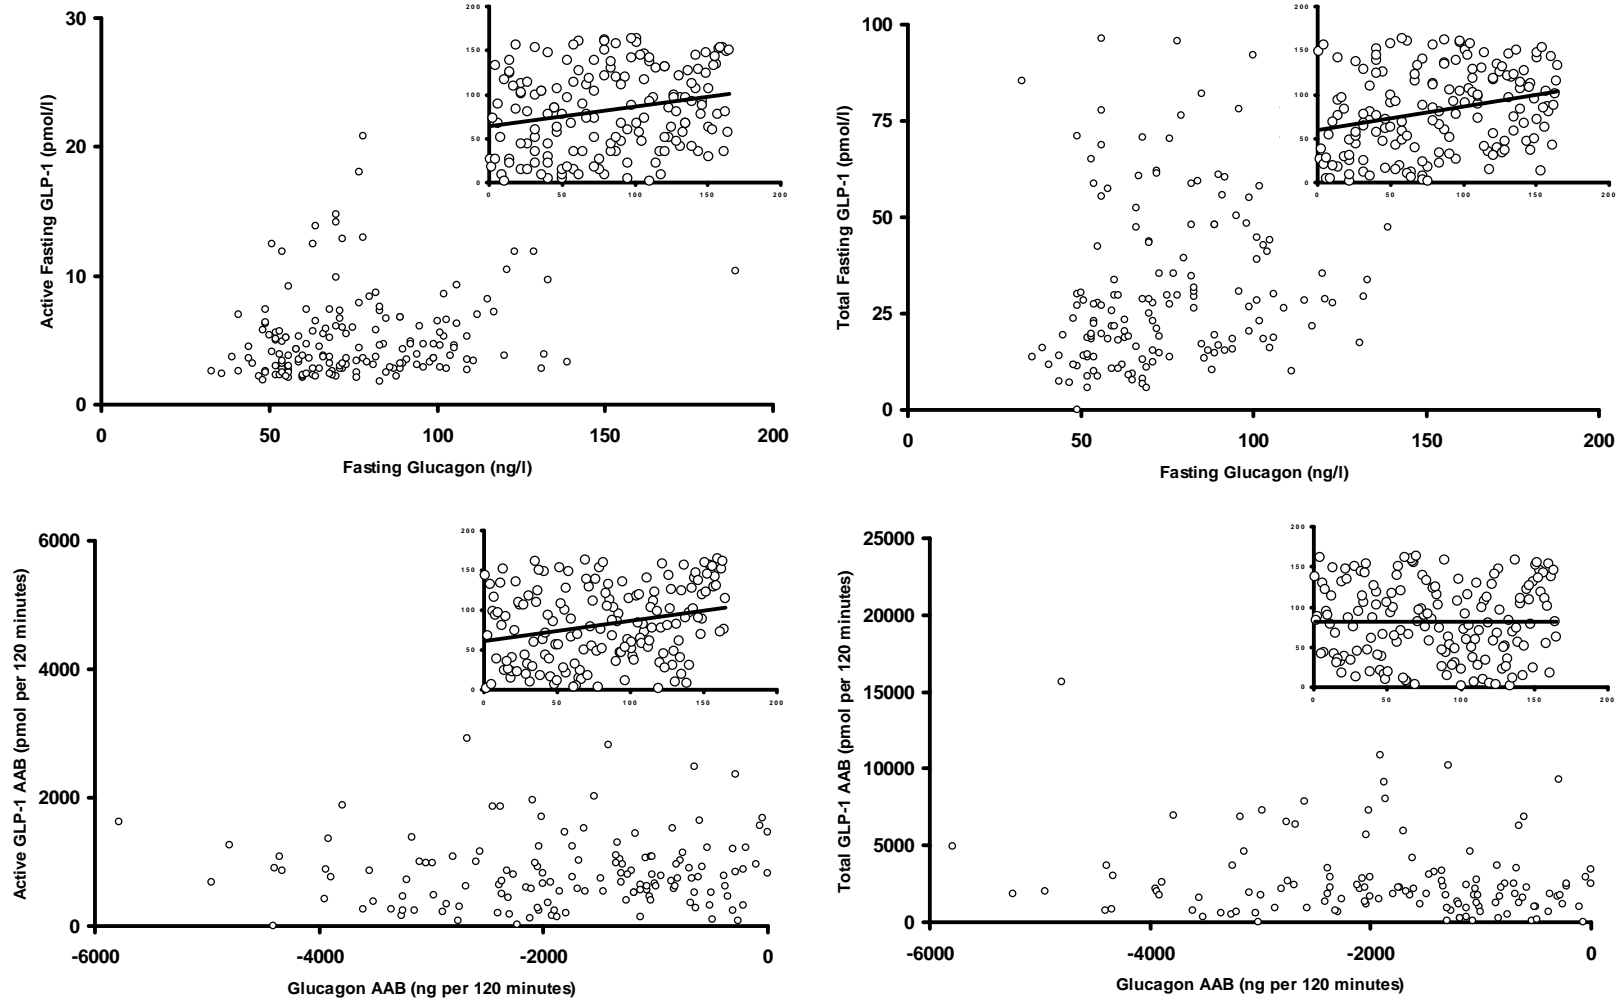

Figure 4: Basal Glucagon levels were univariately associated with basal Active and Total GLP-1 levels ( $r_s = 0.23$ ,  $p < 0.01$ , and  $r_s = 0.28$ ,  $p < 0.001$ , left and right top panel respectively). Integrated active GLP-1 were univariately associated with AUC Glucagon levels ( $r_s = 0.26$ ,  $p < 0.001$ ). In contrast, no univariate association between Total AAB GLP-1 and AUC Glucagon was observed ( $r_s = 0.00$ ,  $p > 0.9$ ). The inset panels represent the rank transformed values of integrated GLP-1 concentrations plotted against rank transformed glucagon.

### **Area Under the Curve (AUC) vs. Area Above Basal (AAB)**

Area Under the Curve (AUC) is calculated using the trapezoidal rule so that in this experiment with values for time 0, 10, 20, 30, 60, 90 and 120, for example  $AUC_{\text{glucose}} = ((\text{Average Glucose}_0 \text{ and Glucose}_{10}) \times (10-0)) + ((\text{Average Glucose}_{10} \text{ and Glucose}_{20}) \times (20-10)) + ((\text{Average Glucose}_{20} \text{ and Glucose}_{30}) \times (30-20)) + ((\text{Average Glucose}_{30} \text{ and Glucose}_{60}) \times (60-30)) + ((\text{Average Glucose}_{60} \text{ and Glucose}_{90}) \times (90-60)) + ((\text{Average Glucose}_{90} \text{ and Glucose}_{120}) \times (120-90))$ .

The Area Above Basal (AAB) is calculated by subtracting integrated basal values from the AUC value so that in the case of glucose  $AAB_{\text{glucose}} = AUC_{\text{glucose}} - (\text{Glucose}_0 \times 120)$ . AAB better represents change in response to a challenge at time zero when there are differences in basal concentrations between groups.
